# Supplementary material for: Activation of the viral sensor oligoadenylate synthetase 2 (Oas2) prevents pregnancy-driven mammary cancer metastases
Source: Springer Nature journal article supplement (doi:10.1186/s13058-022-01525-z), 2022-05-03
Supplement: MOESM5 [file 20366436]

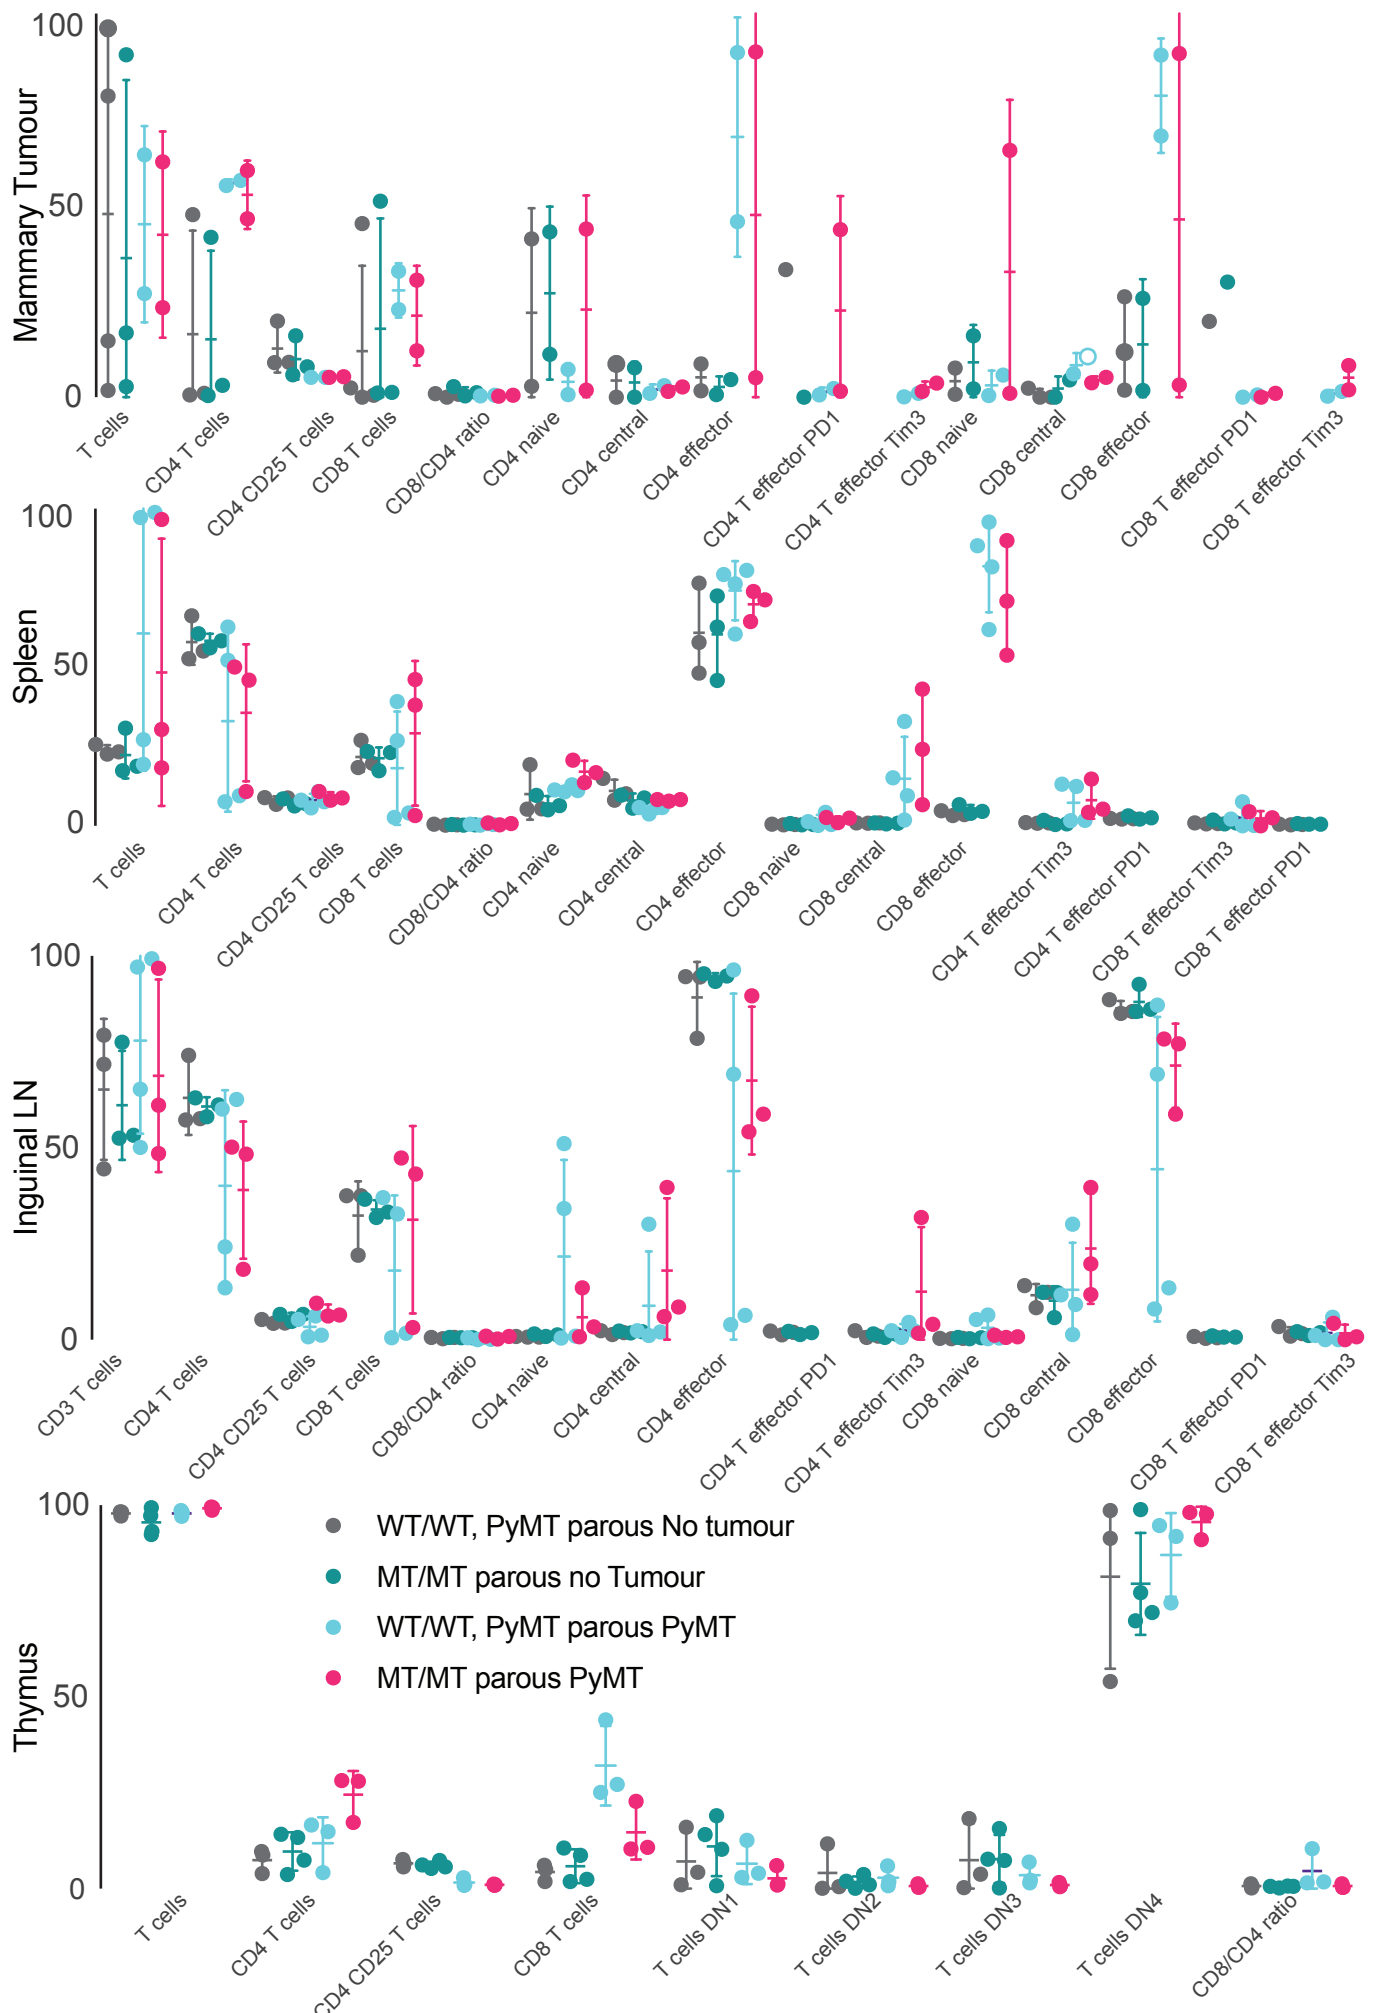

Ho et al. Supplementary Figure 3.
