# Supplementary material for: Activation of the viral sensor oligoadenylate synthetase 2 (Oas2) prevents pregnancy-driven mammary cancer metastases
Source: Springer Nature journal article supplement (doi:10.1186/s13058-022-01525-z), 2022-05-03

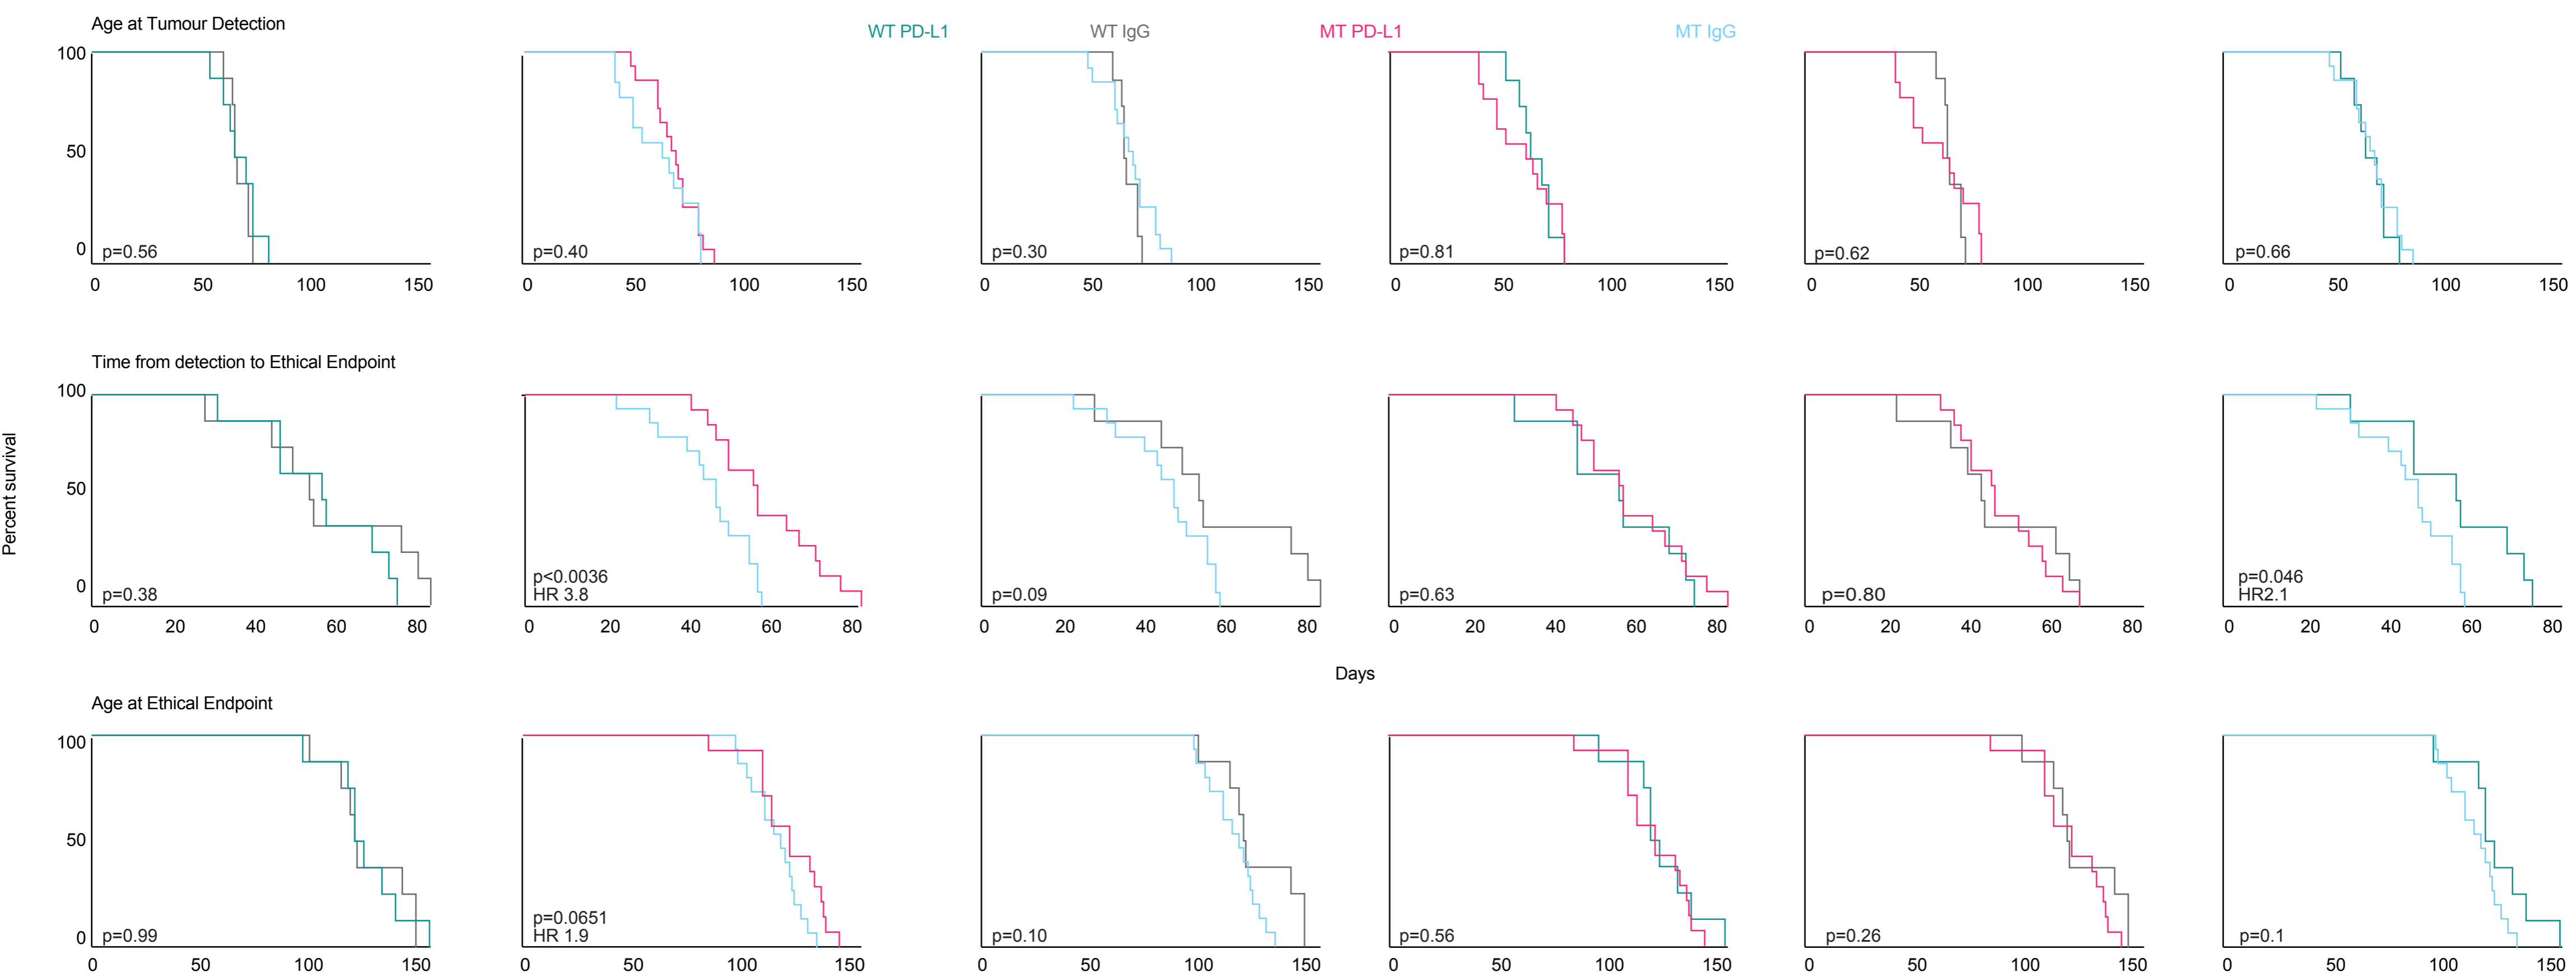

Supplement: MOESM8 [file 20366436]
